# Supplementary material
Source: MDPI journal article supplement (https://www.mdpi.com/2079-6412/9/3/176)
Supplement: s1 [file s1]

# The Antifungal Properties of Super-Hydrophobic Nanoparticles and Essential Oils on Different Material Surfaces

Monika Benkovičová <sup>1</sup>, Zuzana Kisová <sup>2</sup>, Mária Bučková <sup>2</sup>, Eva Majková <sup>1,3</sup>, Peter Šiffalovič <sup>1</sup> and Domenico Pangallo <sup>2,\*</sup>

<sup>1</sup>Institute of Physics, Slovak Academy of Sciences, Dúbravská cesta 9, Sk-84511 Bratislava, Slovakia; [monika.benkovicova@savba.sk](mailto:monika.benkovicova@savba.sk) (M.B.); [peter.siffalovic@savba.sk](mailto:peter.siffalovic@savba.sk) (P.S.)

<sup>2</sup>Institute of Molecular Biology, Slovak Academy of Sciences, Dúbravská cesta 21, SK-84551 Bratislava, Slovakia; [zuzana.kisova@savba.sk](mailto:zuzana.kisova@savba.sk) (Z.K.); [maria.buckova@savba.sk](mailto:maria.buckova@savba.sk) (M.B.)

<sup>3</sup>Center for Advanced Material Application, Slovak Academy of Sciences, Dúbravská cesta 9, Sk-84511 Bratislava, Slovakia; [eva.majkova@savba.sk](mailto:eva.majkova@savba.sk)

\* Correspondence: [domenico.pangallo@savba.sk](mailto:domenico.pangallo@savba.sk)

Received: 7 February 2019; Accepted: 1 March 2019; Published: 6 March 2019

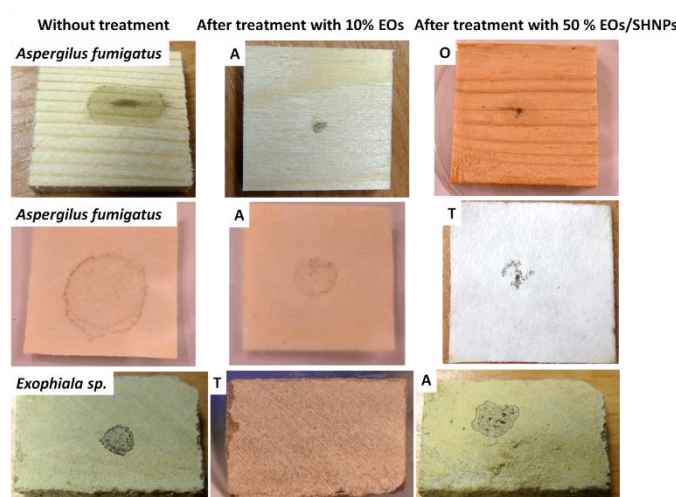

**Figure S1.** Illustrative images of untreated and treated samples affected by fungal growth. A, O, T mean arborvitae, oregano and thyme respectively.

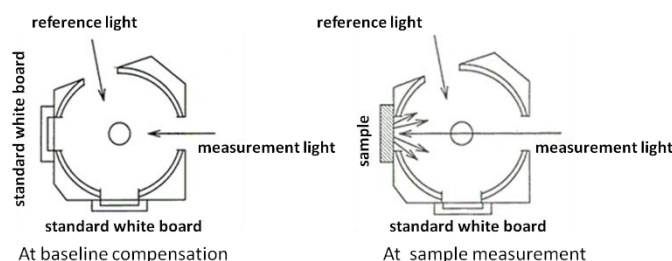

**Figure S2.** Scheme of reflectance measurement in diffuse setting.

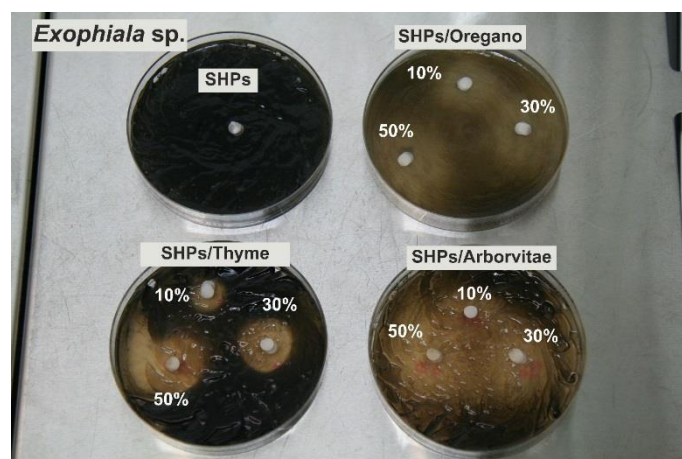

Figure S3. Disc diffusion assay of *Exophiala sp.* on petri dishes.

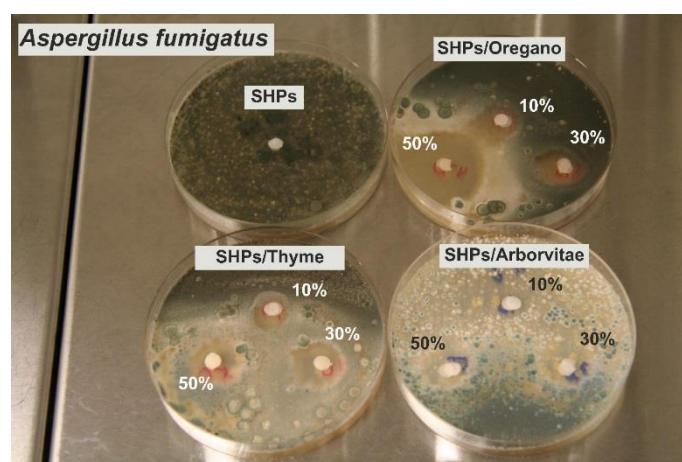

Figure S4. Disc diffusion assay of *A. fumigatus* on petri dishes.

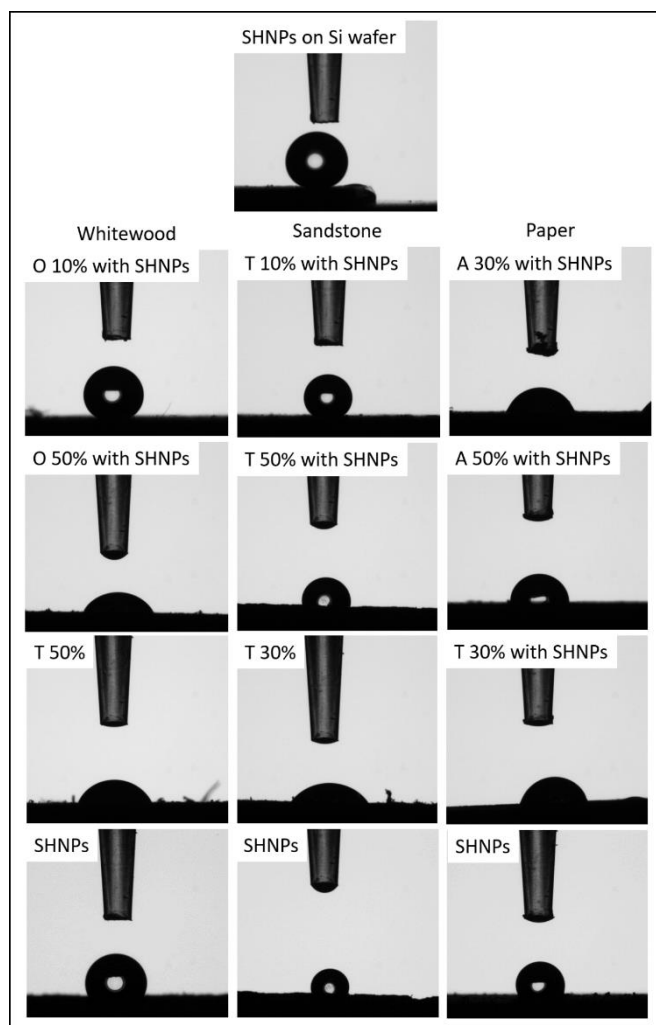

**Figure S5.** The water contact angle measurements of various samples of whitewood, sandstone and paper substrate. A, O, T mean arborvitae, oregano and thyme essential oils respectively.

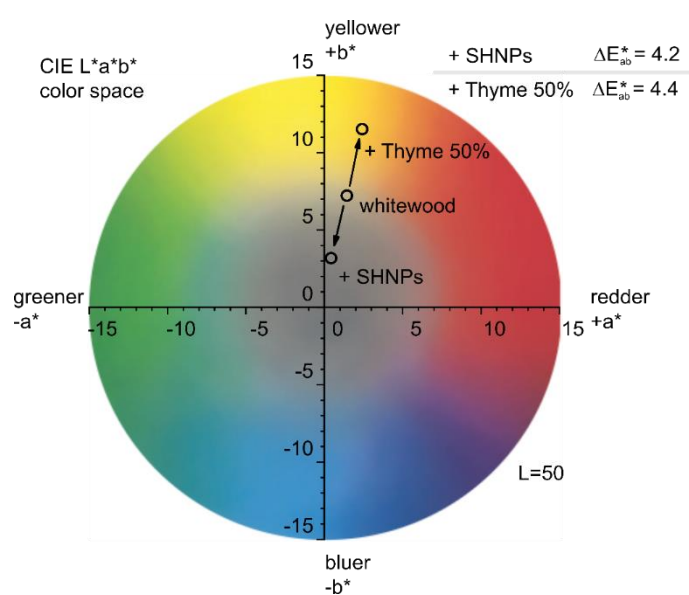

**Figure S6.** Color changes of whitewood samples after application of SHNPs and 50% thyme EO encoded in CIE L\*a\*b\* color space. The color difference.
